# Supplementary material
Source: Springer Nature journal article supplement (https://www.springermedizin.de/resource/supplementary/12887_2013_1032_MOESM2_ESM.pdf/9476968)
Supplement: MOESM2 [file 9476968]

3095 children assessed for eligibility in 4 clinics  
(aged 2-4.9 years; BMI z-score 0-<3; without  
prescribed diet or activity limitations)

2111 children measured in  
2 clinics randomized to intervention

1127 ineligible  
644 Age < 2 or > 5 years  
483 BMI z-score < 0 or > 3

984 eligible

816 did provide informed consent

168 enrolled

69 missing at 3 months  
Reasons:  
43 no answer/ unable to contact  
12 working  
11 illness; other domestic issues  
3 change of address

6 missing at 6 months  
Reasons:  
5 no answer/ unable to contact  
1 change of address

99 with 3 month behaviors and BMI

109 with 6 month behaviors and BMI

93 complete 3 & 6 month follow-up

984 children measured in  
2 clinics randomized to usual care

562 ineligible  
283 Age < 2 or > 5 years  
279 BMI z-score < 0 or > 3

422 eligible

284 did provide informed consent

138 enrolled

36 missing at 3 months  
Reasons:  
31 no answer/ unable to contact  
5 change of address

4 missing at 6 months  
Reasons:  
2 no answer/ unable to contact  
2 change of address

102 with 3 month behaviors (99 BMI)

102 with 6 month behaviors (99 BMI)

96 complete 3 & 6 month follow-up
